# Supplementary material
Source: PubMed Central journal article supplement (PMC10842439)
Supplement: NIHMS1942005-supplement-322858_Major_Resources_Table.pdf [file NIHMS1942005-supplement-322858_Major_Resources_Table.pdf]

## Major Resources Table

In order to allow validation and replication of experiments, all essential research materials listed in the Methods should be included in the Major Resources Table below. Authors are encouraged to use public repositories for protocols, data, code, and other materials and provide persistent identifiers and/or links to repositories when available. Authors may add or delete rows as needed.

### Animals (in vivo studies)

| Species | Vendor or Source       | Background Strain | Sex    | Persistent ID / URL                                                               |
|---------|------------------------|-------------------|--------|-----------------------------------------------------------------------------------|
| Mouse   | The Jackson Laboratory | C57BL/6J          | Female | <a href="https://www.jax.org/strain/002052">https://www.jax.org/strain/002052</a> |

### Antibodies

| Target antigen                                | Vendor or Source | Catalog #  | Working concentration | Persistent ID / URL                                                                                                                                                                                                                                                                                                                     |
|-----------------------------------------------|------------------|------------|-----------------------|-----------------------------------------------------------------------------------------------------------------------------------------------------------------------------------------------------------------------------------------------------------------------------------------------------------------------------------------|
| Anti-mouse CD11b (Clone:M/7)-BV570            | BioLegend        | 101233     | 0.25uL/test           | <a href="http://www.biolegend.com/fr-lu/products/brilliant-violet-570-anti-mouse-human-cd11b-antibody-7380">www.biolegend.com/fr-lu/products/brilliant-violet-570-anti-mouse-human-cd11b-antibody-7380</a>                                                                                                                              |
| Anti-mouse CD45 (Clone:EM-05)-PerCP           | Invitrogen       | MA1-10234  | 0.25uL/test           | <a href="http://www.thermofisher.com/antibody/product/CD45-Antibody-clone-EM-05-Monoclonal/MA1-10234">www.thermofisher.com/antibody/product/CD45-Antibody-clone-EM-05-Monoclonal/MA1-10234</a>                                                                                                                                          |
| Anti-mouse SiglecF (Clone:S17007L)-BV421      | BioLegend        | 155509     | 0.25uL/test           | <a href="https://www.biolegend.com/en-us/products/brilliant-violet-421-anti-mouse-cd170-siglec-f-antibody-17872?Clone=S17007L">https://www.biolegend.com/en-us/products/brilliant-violet-421-anti-mouse-cd170-siglec-f-antibody-17872?Clone=S17007L</a>                                                                                 |
| Anti-mouse Ly6G (Clone:1A8)-APC/FIRE 810      | BioLegend        | 127670     | 0.25uL/test           | <a href="https://www.biolegend.com/nl-be/products/apc-fire-810-anti-mouse-ly-6g-antibody-21380?GroupID=BLG5803">https://www.biolegend.com/nl-be/products/apc-fire-810-anti-mouse-ly-6g-antibody-21380?GroupID=BLG5803</a>                                                                                                               |
| Anti-mouse Ly6C (Clone:HK1.4)-Alexa Fluor 700 | BioLegend        | 128023     | 0.25uL/test           | <a href="https://www.biolegend.com/en-gb/clone-search/alexa-fluor-700-anti-mouse-ly-6c-antibody-6757?GroupID=BLG7242">https://www.biolegend.com/en-gb/clone-search/alexa-fluor-700-anti-mouse-ly-6c-antibody-6757?GroupID=BLG7242</a>                                                                                                   |
| Anti-mouse CD62L (Clone:MEL-14)-APC           | BioLegend        | 104411     | 0.0625uL/test         | <a href="https://www.biolegend.com/en-us/products/apc-anti-mouse-cd62l-antibody-381?GroupID=BLG10670">https://www.biolegend.com/en-us/products/apc-anti-mouse-cd62l-antibody-381?GroupID=BLG10670</a>                                                                                                                                   |
| Anti-mouse CD1d (Clone:1B1)-BV480             | BD Bioscience    | 746412     | 0.0625uL/test         | <a href="https://www.bdbiosciences.com/en-be/products/reagents/flow-cytometry-reagents/research-reagents/single-color-antibodies-ruo/bv480-rat-anti-mouse-cd1d.746412">https://www.bdbiosciences.com/en-be/products/reagents/flow-cytometry-reagents/research-reagents/single-color-antibodies-ruo/bv480-rat-anti-mouse-cd1d.746412</a> |
| Anti-mouse CD63 (Clone:NVG-2)-PE/Cy7          | Invitrogen       | 25-0631-82 | 0.125uL/test          | <a href="https://www.thermofisher.com/antibody/product/CD63-Antibody-clone-NVG-2-Monoclonal/25-0631-82">https://www.thermofisher.com/antibody/product/CD63-Antibody-clone-NVG-2-Monoclonal/25-0631-82</a>                                                                                                                               |
| Anti-mouse cKit (CD117) (Clone:2B8)-APC       | BioLegend        | 105812     | 0.125uL/test          | <a href="https://www.biolegend.com/en-ie/lyophilized-control-cells/apc-anti-mouse-cd117-c-kit-antibody-72">https://www.biolegend.com/en-ie/lyophilized-control-cells/apc-anti-mouse-cd117-c-kit-antibody-72</a>                                                                                                                         |
| Anti-mouse Sca-1 (Clone:D7)-PE/Cy7            | BioLegend        | 108114     | 0.0625uL/test         | <a href="https://www.biolegend.com/en-gb/products/pe-cyanine7-anti-mouse-ly-6a-e-sca-1-antibody-3137?GroupID=BLG2524">https://www.biolegend.com/en-gb/products/pe-cyanine7-anti-mouse-ly-6a-e-sca-1-antibody-3137?GroupID=BLG2524</a>                                                                                                   |
| Anti-mouse CD16/32 (Clone:93)-Alexa Fluor 647 | BioLegend        | 101314     | 0.125uL/test          | <a href="https://www.fishersci.com/shop/products/a647-anti-mu-cd16-32/50162546">https://www.fishersci.com/shop/products/a647-anti-mu-cd16-32/50162546</a>                                                                                                                                                                               |

DOI [to be added]

|                                                            |             |            |                                                     |                                                                                                                                                                                                                                                         |
|------------------------------------------------------------|-------------|------------|-----------------------------------------------------|---------------------------------------------------------------------------------------------------------------------------------------------------------------------------------------------------------------------------------------------------------|
| Anti-mouse CD34 (Clone:HM34)-PE                            | BioLegend   | 128610     | 0.5uL/test                                          | <a href="https://www.biolegend.com/en-gb/soluble-mhc/pe-anti-mouse-cd34-antibody-6332">https://www.biolegend.com/en-gb/soluble-mhc/pe-anti-mouse-cd34-antibody-6332</a>                                                                                 |
| Anti-mouse CD48 (Clone:HM48-1) APC eFluor780               | eBioscience | 47-0481-82 | 0.25uL/test                                         | <a href="https://www.thermofisher.com/antibody/product/CD48-Antibody-clone-HM48-1-Monoclonal/47-0481-82">https://www.thermofisher.com/antibody/product/CD48-Antibody-clone-HM48-1-Monoclonal/47-0481-82</a>                                             |
| Anti-mouse CD150 (Clone:TC15-12F12.2)-PB                   | BioLegend   | 115924     | 0.25uL/test                                         | <a href="https://www.biolegend.com/en-us/search-results/pacific-blue-anti-mouse-cd150-slam-antibody-5834">https://www.biolegend.com/en-us/search-results/pacific-blue-anti-mouse-cd150-slam-antibody-5834</a>                                           |
| Anti-mouse CD41 (Clone: )-BV605                            | BioLegend   | 133921     | 0.0625uL/test                                       | <a href="https://www.biolegend.com/en-us/products/brilliant-violet-605-anti-mouse-cd41-antibody-9927">https://www.biolegend.com/en-us/products/brilliant-violet-605-anti-mouse-cd41-antibody-9927</a>                                                   |
| Anti-mouse CD19 (Clone: )-APC/Cy7                          | BioLegend   | 115530     | 0.25uL/test                                         | <a href="https://www.biolegend.com/en-ie/products/apc-cyanine7-anti-mouse-cd19-antibody-22018?GroupID=BLG15527">https://www.biolegend.com/en-ie/products/apc-cyanine7-anti-mouse-cd19-antibody-22018?GroupID=BLG15527</a>                               |
| TruStain fcX™ (anti-mouse CD16/32, Clone 93)               | BioLegend   | 101320     | 1uL/1x10 <sup>6</sup> cells                         | <a href="https://www.biolegend.com/en-us/products/trustain-fcx-anti-mouse-cd16-32-antibody-5683">https://www.biolegend.com/en-us/products/trustain-fcx-anti-mouse-cd16-32-antibody-5683</a>                                                             |
| Rat anti-mouse Ly6G (Clone: 1A8)                           | Bio X Cell  | BE0075-1   | 1 <sup>st</sup> week: 25 g/mouse; after 50 ug/mouse | <a href="https://bioxcell.com/invivomab-anti-mouse-ly6g-be0075-1">https://bioxcell.com/invivomab-anti-mouse-ly6g-be0075-1</a>                                                                                                                           |
| Rat IgG2a Isotype Control (Clone 2A3)                      | Bio X Cell  | 849232M2   | 1 <sup>st</sup> week: 25 g/mouse; after 50 ug/mouse | <a href="https://bioxcell.com/catalogsearch/result/?q=Rat%20IgG2a%20Isotype%20Control%20(Clon%202A3)%20805321D1">https://bioxcell.com/catalogsearch/result/?q=Rat%20IgG2a%20Isotype%20Control%20(Clon%202A3)%20805321D1</a>                             |
| Anti-rat Kappa Immunoglobulin Light Chain (Clone: MAR18.5) | Bio X Cell  | 805321D1   | 25 ug/mouse                                         | <a href="https://bioxcell.com/catalogsearch/result/?q=Anti-rat%20Kappa%20Immunoglobulin%20Light%20Chain%20(Clon%3A%20MAR18.5)">https://bioxcell.com/catalogsearch/result/?q=Anti-rat%20Kappa%20Immunoglobulin%20Light%20Chain%20(Clon%3A%20MAR18.5)</a> |
| Mouse IgG2a Isotype Control (Clone: C1.18.4)               | Bio X Cell  | 833923F1   | 25 ug/mouse                                         | <a href="https://bioxcell.com/invivomab-mouse-igg2a-isotype-control-unknown-specificity-be0085">https://bioxcell.com/invivomab-mouse-igg2a-isotype-control-unknown-specificity-be0085</a>                                                               |

### Cultured Cells

| Name                      | Vendor or Source  | Sex (F, M, or unknown) | Persistent ID / URL |
|---------------------------|-------------------|------------------------|---------------------|
| Primary mouse aortic VSMC | Isolated in a lab | Unknown                |                     |

### Other

| Description                                             | Source / Repository     | Persistent ID / URL |
|---------------------------------------------------------|-------------------------|---------------------|
| Mouse Lipopolysaccharides (LPS) ELISA Kit               | MyBioSource             | MBS261904           |
| Quant-iT™ PicoGreen™ dsDNA Assay Kit and dsDNA Reagents | Invitrogen              | P7589               |
| Free Cholesterol E, Wako                                | Wako Life sciences      | CA11—1-650          |
| DCFDA/H2DCFDA-Cellular ROS Assay Kit                    | abcam                   | ab113851            |
| ZombieNIR Viability Stain                               | BioLegend               | 423105              |
| Cell Trace™ Violet Cell Proliferation Kit               | ThermoFisher Scientific | C34557              |

DOI [to be added]

|                                                                                       |                            |           |
|---------------------------------------------------------------------------------------|----------------------------|-----------|
| Cell Trace™ Far Red                                                                   | ThermoFisher Scientific    | C34572    |
| Cell Trace™ (CFSE) Cell Proliferation Kit                                             | ThermoFisher Scientific    | C34554    |
| SytoxGreen Nucleic Acid Stain-5mM solution in DMSO                                    | Invitrogen                 | S7020     |
| DMEM/F12 +GlutaMAX™-1 (1X) [+]<br>Sodium Bicarbonate [+]<br>Sodium Pyruvate[+]10% FBS | Gibco by life technologies | 10565042  |
| Recombinant Murine PDGF-BB                                                            | Peprtech                   | 315-18    |
| Oil Red O                                                                             | Sigma Aldrich              | 00625     |
| Picosirius Red                                                                        | Polysciences, Inc.         | 24901     |
| Movat Pentachrome Stain Kit (Modified Russell-Movat)                                  | Abcam                      | ab245884  |
| Epredia™ Cytoseal™ Mountant; 60, 280 and XYL                                          | Epredia                    | 8311-4    |
| Tissue-Tek® O.C.T. Compound                                                           | VWR                        | 25608-930 |
|                                                                                       |                            |           |
